# Supplementary material for: PeacoQC: Peak‐based selection of high quality cytometry data
Source: PubMed Central journal article supplement — Cytometry A. 2021 Oct 3;101(4):325–38. doi: 10.1002/cyto.a.24501 (PMC9293479; doi:10.1002/cyto.a.24501), 2021-10-03
Supplement: CYTO-101-325-s003.pdf [file CYTO-101-325-s003.pdf]

### A. Balanced accuracy

|                  | flowAI   | flowAI (FS & FM) | flowClean | flowCut  | PeacoQC  |
|------------------|----------|------------------|-----------|----------|----------|
| flowAI (FS & FM) | 4.10e-01 |                  |           |          |          |
| flowClean        | 1.93e-01 | 1.81e-01         |           |          |          |
| flowCut          | 1.67e-02 | 5.39e-02         | 6.52e-03  |          |          |
| PeacoQC          | 6.74e-03 | 5.46e-02         | 6.24e-03  | 8.88e-01 |          |
| Random           | 5.39e-02 | 9.62e-02         | 2.02e-01  | 5.55e-03 | 5.55e-03 |

### B. Sensitivity

|                  | flowAI   | flowAI (FS & FM) | flowClean | flowCut  | PeacoQC  |
|------------------|----------|------------------|-----------|----------|----------|
| flowAI (FS & FM) | 5.27e-01 |                  |           |          |          |
| flowClean        | 4.86e-04 | 2.81e-03         |           |          |          |
| flowCut          | 6.40e-01 | 5.20e-01         | 4.86e-04  |          |          |
| PeacoQC          | 2.21e-01 | 1.28e-01         | 2.23e-05  | 4.60e-01 |          |
| Random           | 4.60e-02 | 2.16e-01         | 3.12e-02  | 1.33e-03 | 2.23e-05 |

### C. Specificity

|                  | flowAI   | flowAI (FS & FM) | flowClean | flowCut  | PeacoQC  |
|------------------|----------|------------------|-----------|----------|----------|
| flowAI (FS & FM) | 8.29e-08 |                  |           |          |          |
| flowClean        | 3.25e-21 | 3.25e-21         |           |          |          |
| flowCut          | 5.44e-06 | 1.77e-03         | 6.58e-08  |          |          |
| PeacoQC          | 1.86e-03 | 6.49e-01         | 1.29e-11  | 2.82e-01 |          |
| Random           | 4.27e-01 | 1.23e-01         | 2.47e-12  | 7.82e-05 | 7.66e-05 |

### D. Percentage Removed

|                  | flowAI   | flowAI (FS & FM) | flowClean | flowCut  | PeacoQC  |
|------------------|----------|------------------|-----------|----------|----------|
| flowAI (FS & FM) | 2.52e-03 |                  |           |          |          |
| flowClean        | 2.57e-12 | 1.09e-09         |           |          |          |
| flowCut          | 2.40e-01 | 7.10e-01         | 3.84e-06  |          |          |
| PeacoQC          | 9.23e-01 | 3.84e-01         | 1.30e-10  | 6.46e-01 |          |
| Random           | 7.17e-01 | 9.23e-01         | 1.63e-07  | 7.10e-01 | 9.23e-01 |
