# Supplementary material for: PeacoQC: Peak‐based selection of high quality cytometry data
Source: PubMed Central journal article supplement — Cytometry A. 2021 Oct 3;101(4):325–38. doi: 10.1002/cyto.a.24501 (PMC9293479; doi:10.1002/cyto.a.24501), 2021-10-03
Supplement: CYTO-101-325-s006.pdf [file CYTO-101-325-s006.pdf]

FR-FCM-ZZQV: file 1/4 (n= 626204 cells)

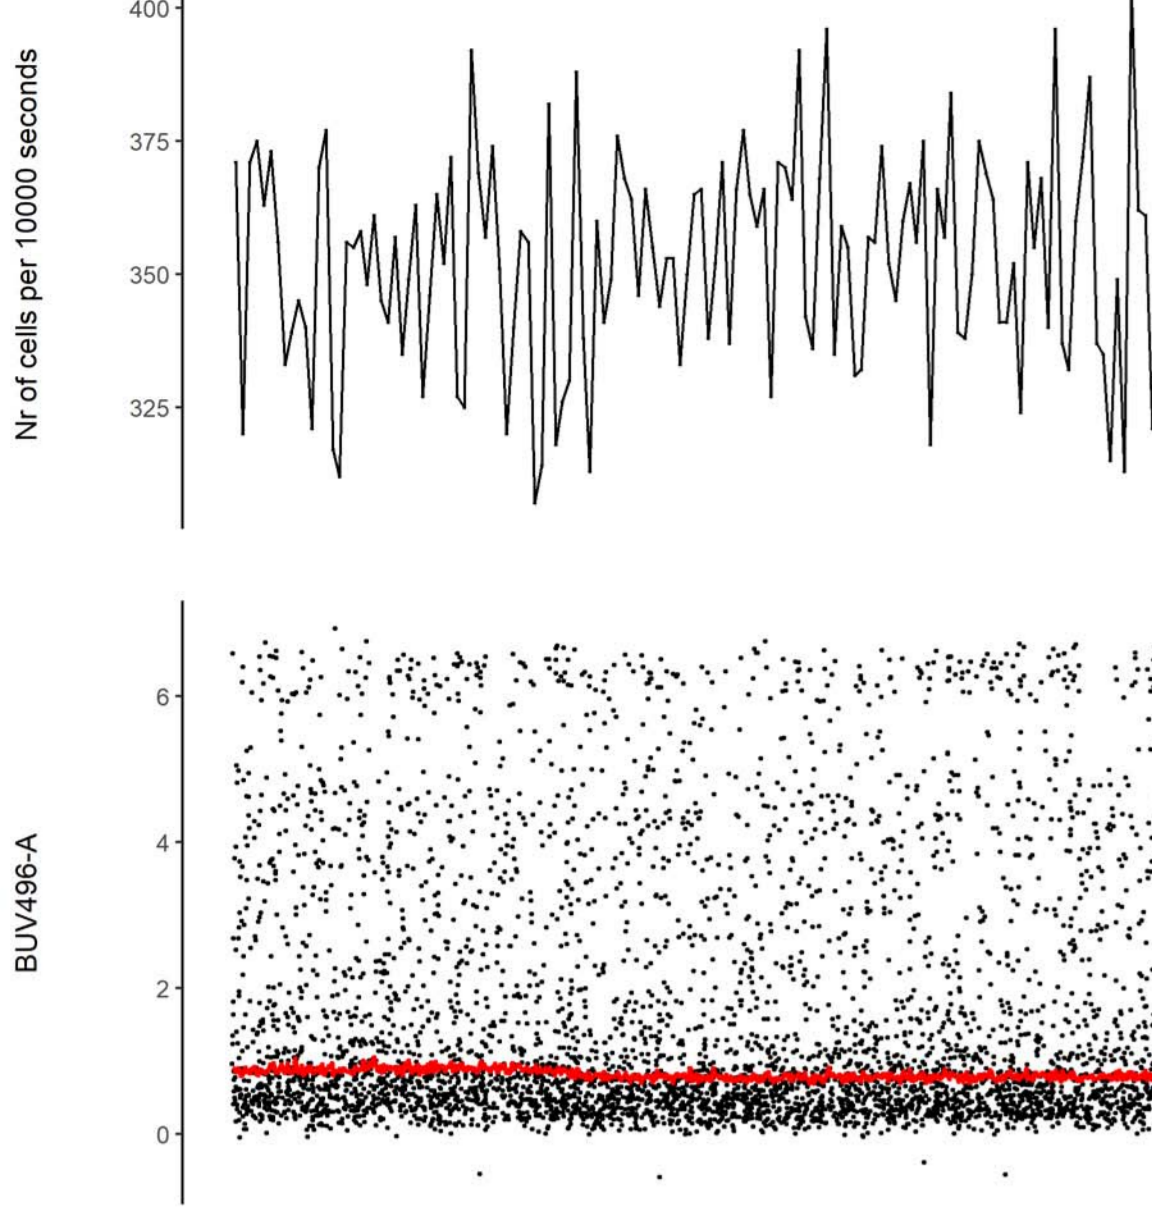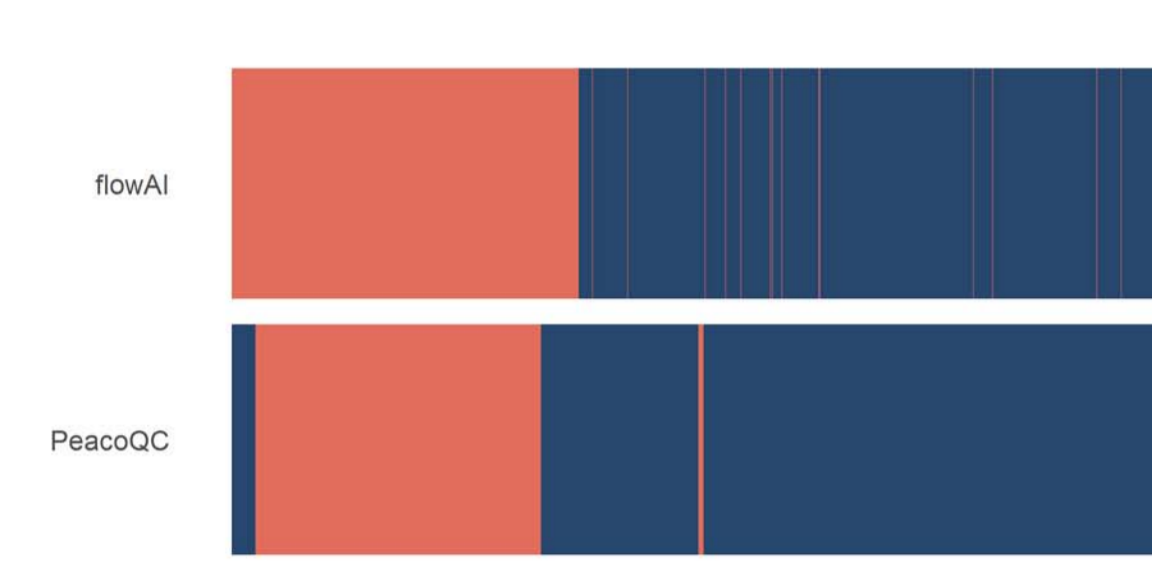

flowAI

PeacoQC

Events ordered on time

FR-FCM-ZZEK: file 1/1 (n= 10000000 cells)

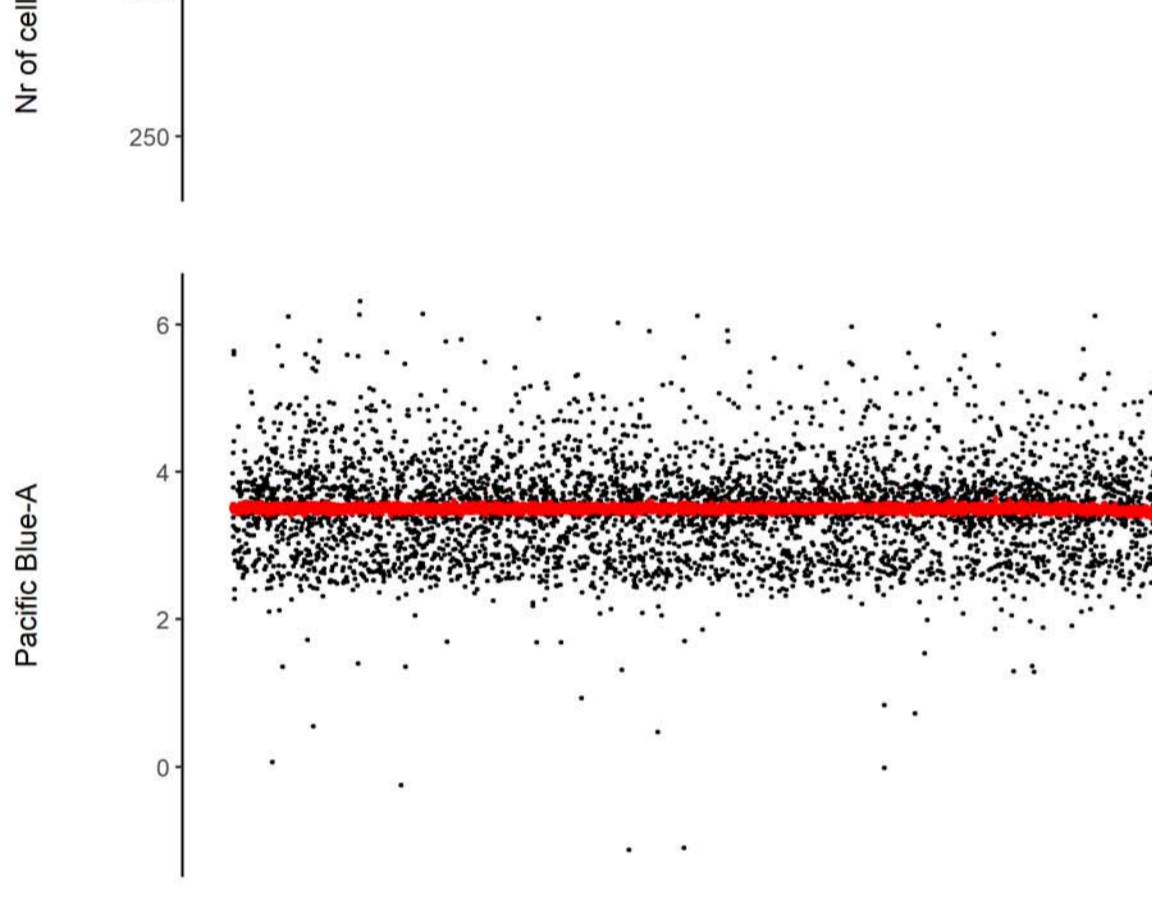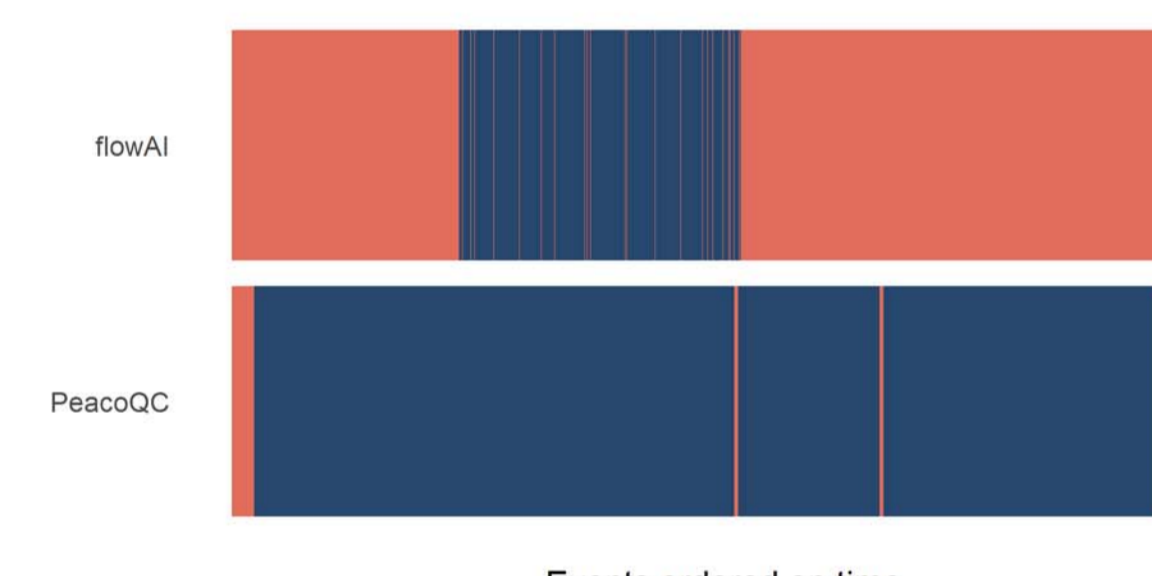

flowAI

PeacoQC

Events ordered on time

FR-FCM-ZZEL: file 1/2 (n= 10000000 cells)

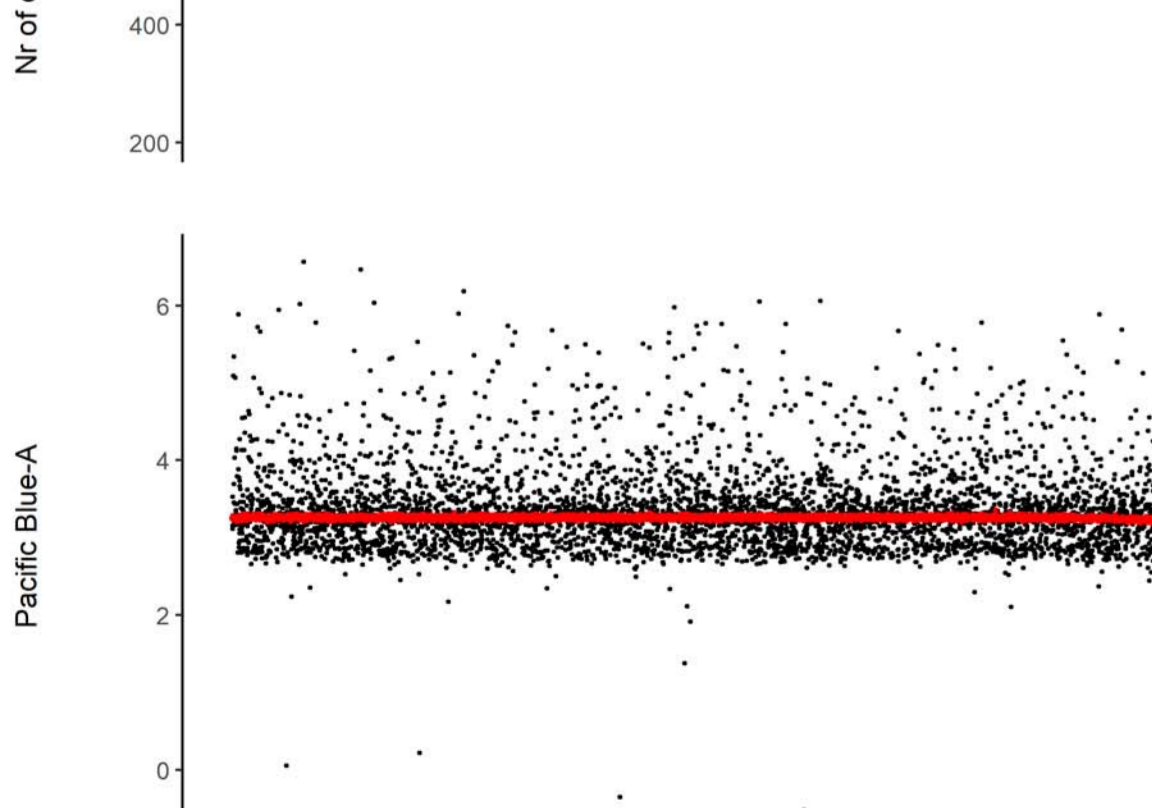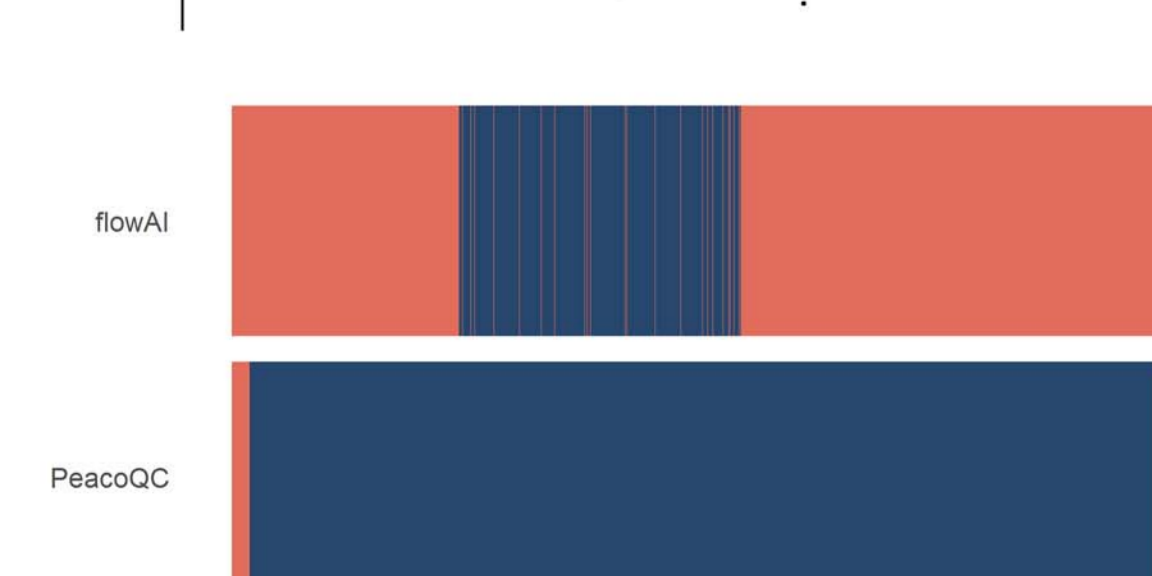

flowAI

PeacoQC

Events ordered on time

FR-FCM-ZZQV: file 2/4 (n= 664212 cells)

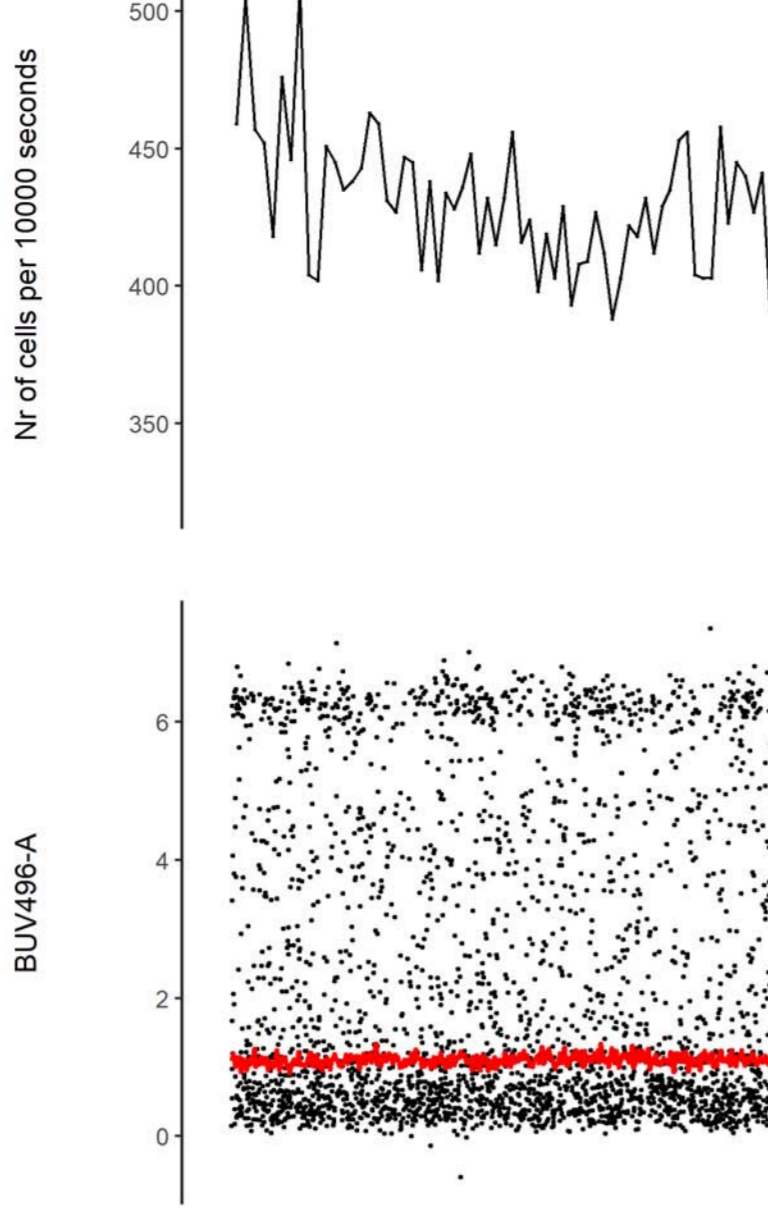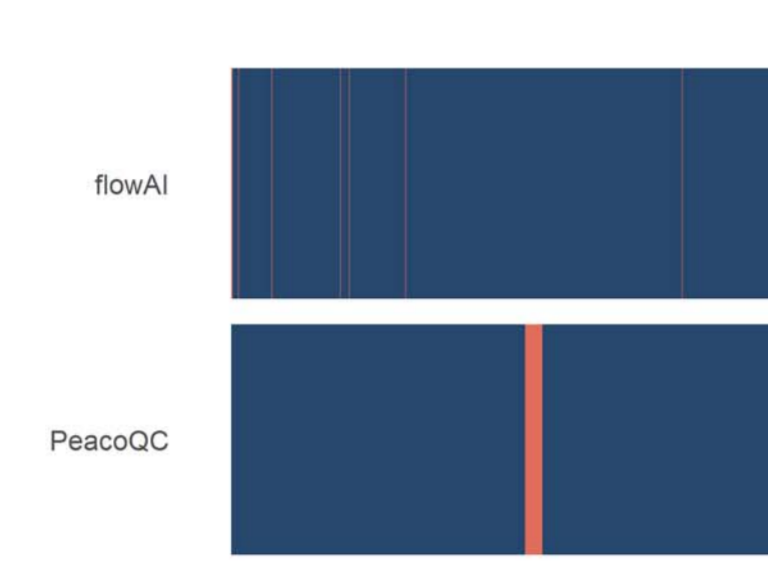

flowAI

PeacoQC

Events ordered on time

FR-FCM-ZZEM: file 1/3 (n= 7930400 cells)

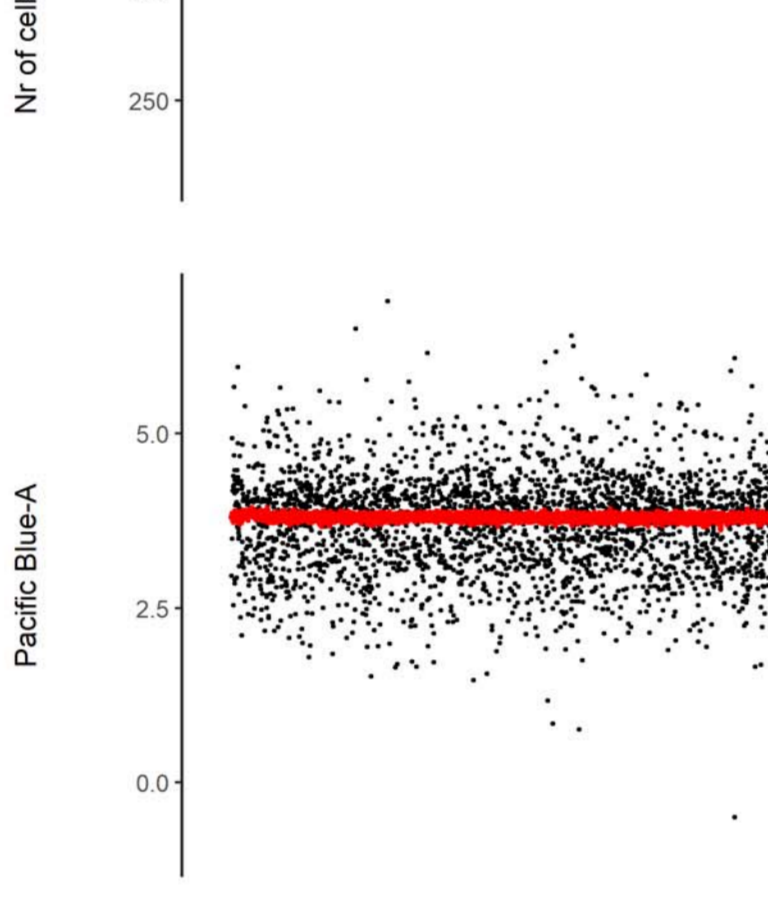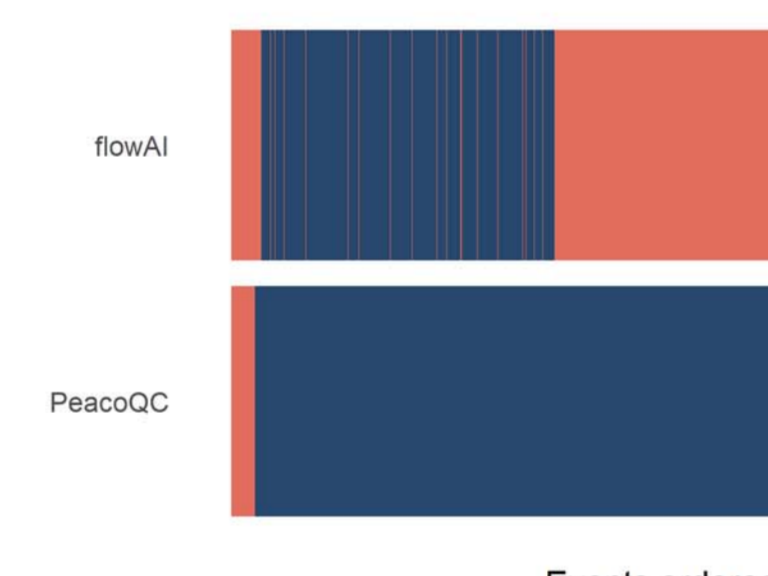

flowAI

PeacoQC

Events ordered on time

FR-FCM-ZZEL: file 2/2 (n= 8678744 cells)

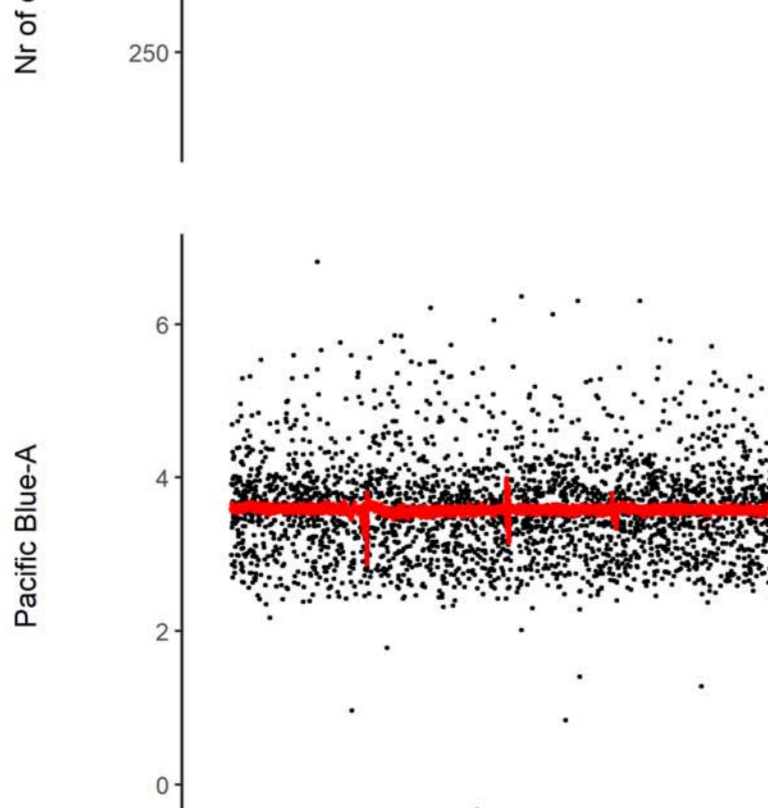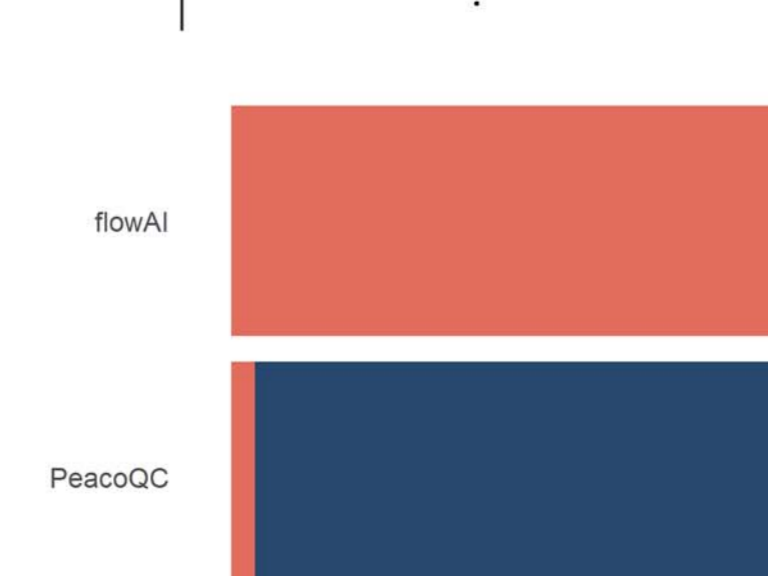

flowAI

PeacoQC

Events ordered on time

FR-FCM-ZZQV: file 3/4 (n= 647016 cells)

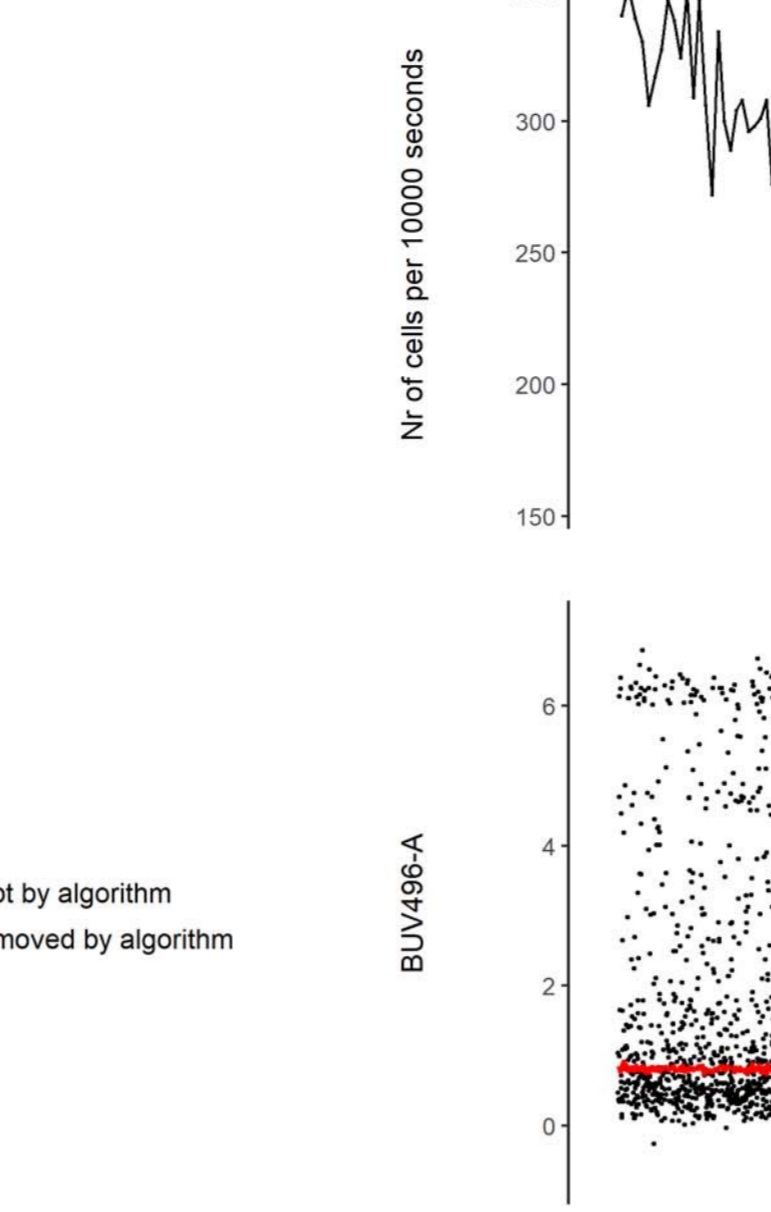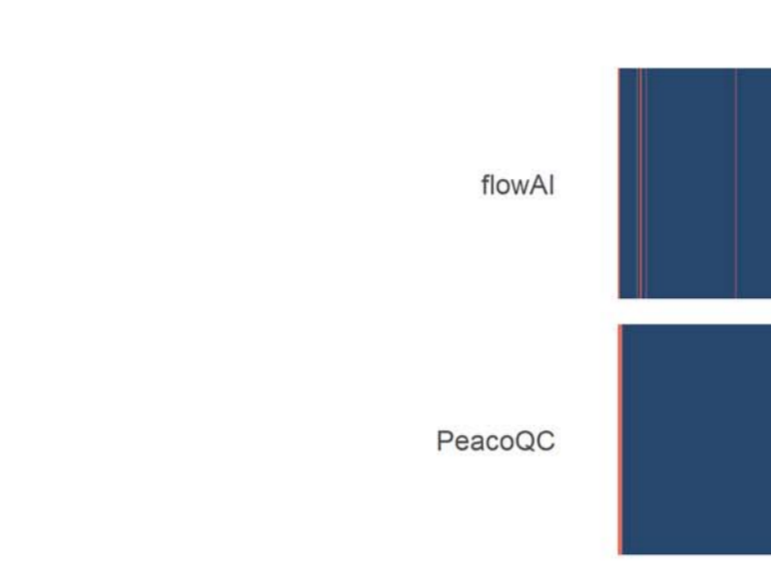

flowAI

PeacoQC

Events ordered on time

FR-FCM-ZZEM: file 2/3 (n= 10000000 cells)

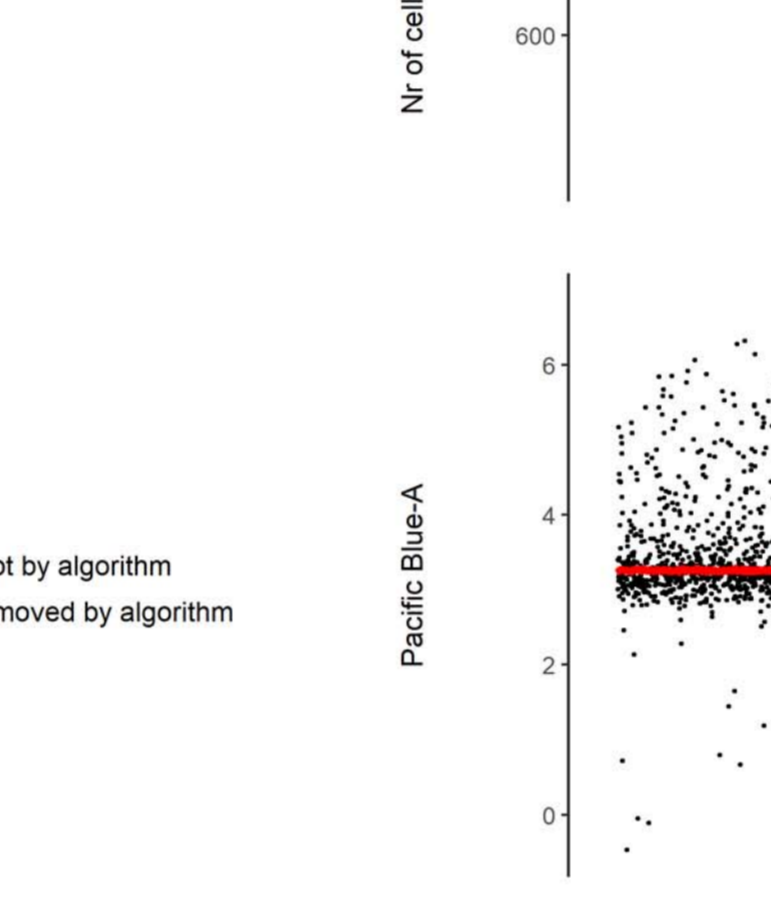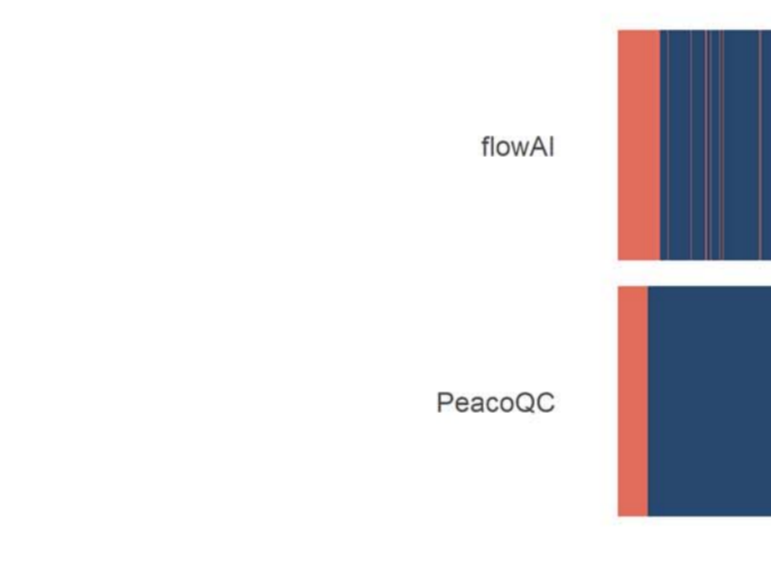

flowAI

PeacoQC

Events ordered on time

FR-FCM-ZZQV: file 4/4 (n= 634872 cells)

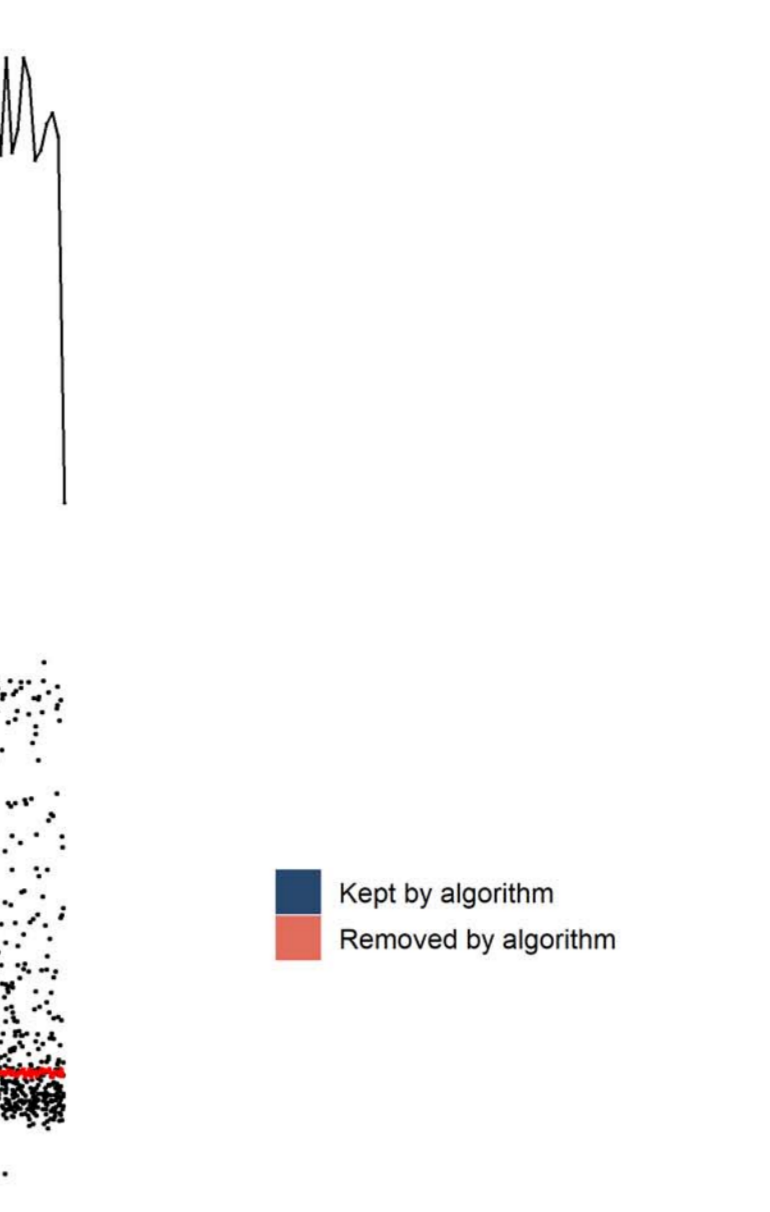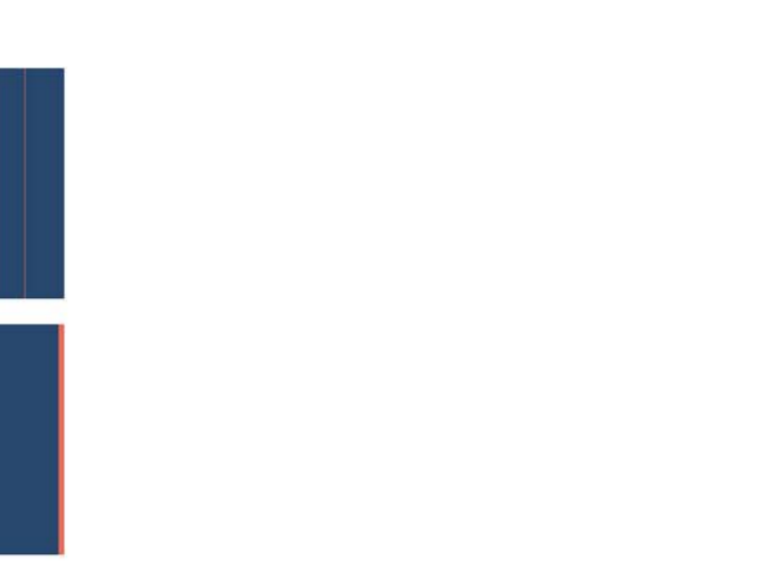

flowAI

PeacoQC

Events ordered on time

FR-FCM-ZZEM: file 3/3 (n= 10475592 cells)

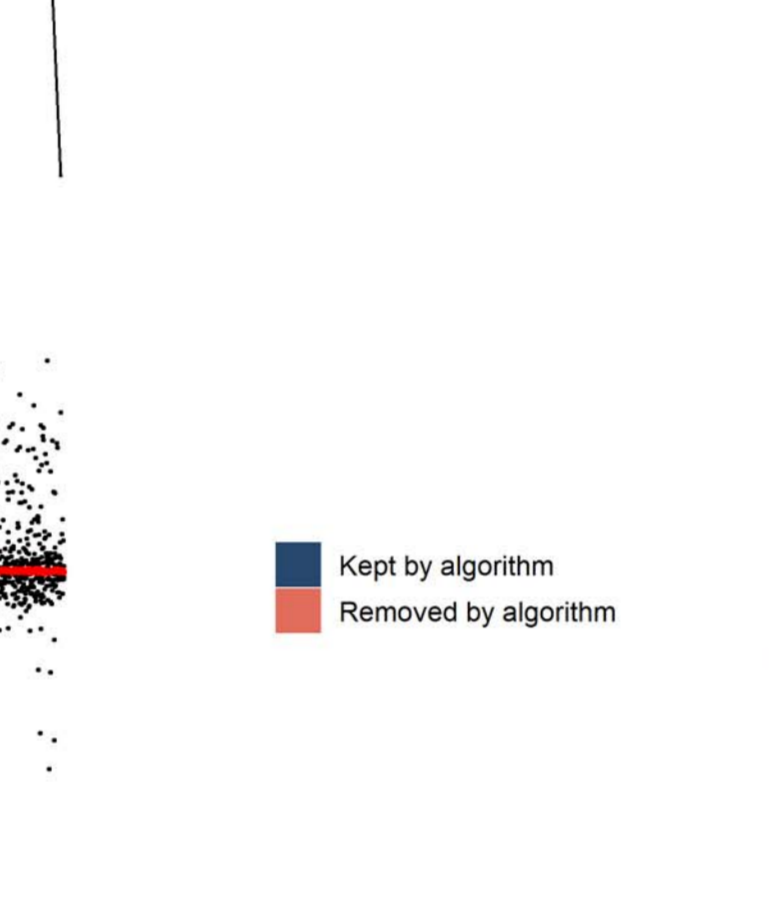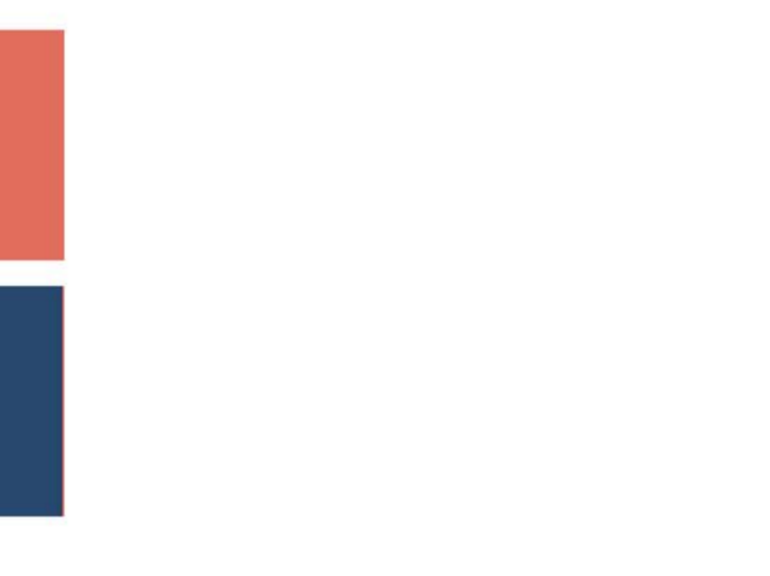

flowAI

PeacoQC

Events ordered on time
