# Supplementary figures and images for: PeacoQC: Peak‐based selection of high quality cytometry data
Source: PubMed Central journal article supplement — Cytometry A. 2021 Oct 3;101(4):325–38. doi: 10.1002/cyto.a.24501 (PMC9293479; doi:10.1002/cyto.a.24501), 2021-10-03

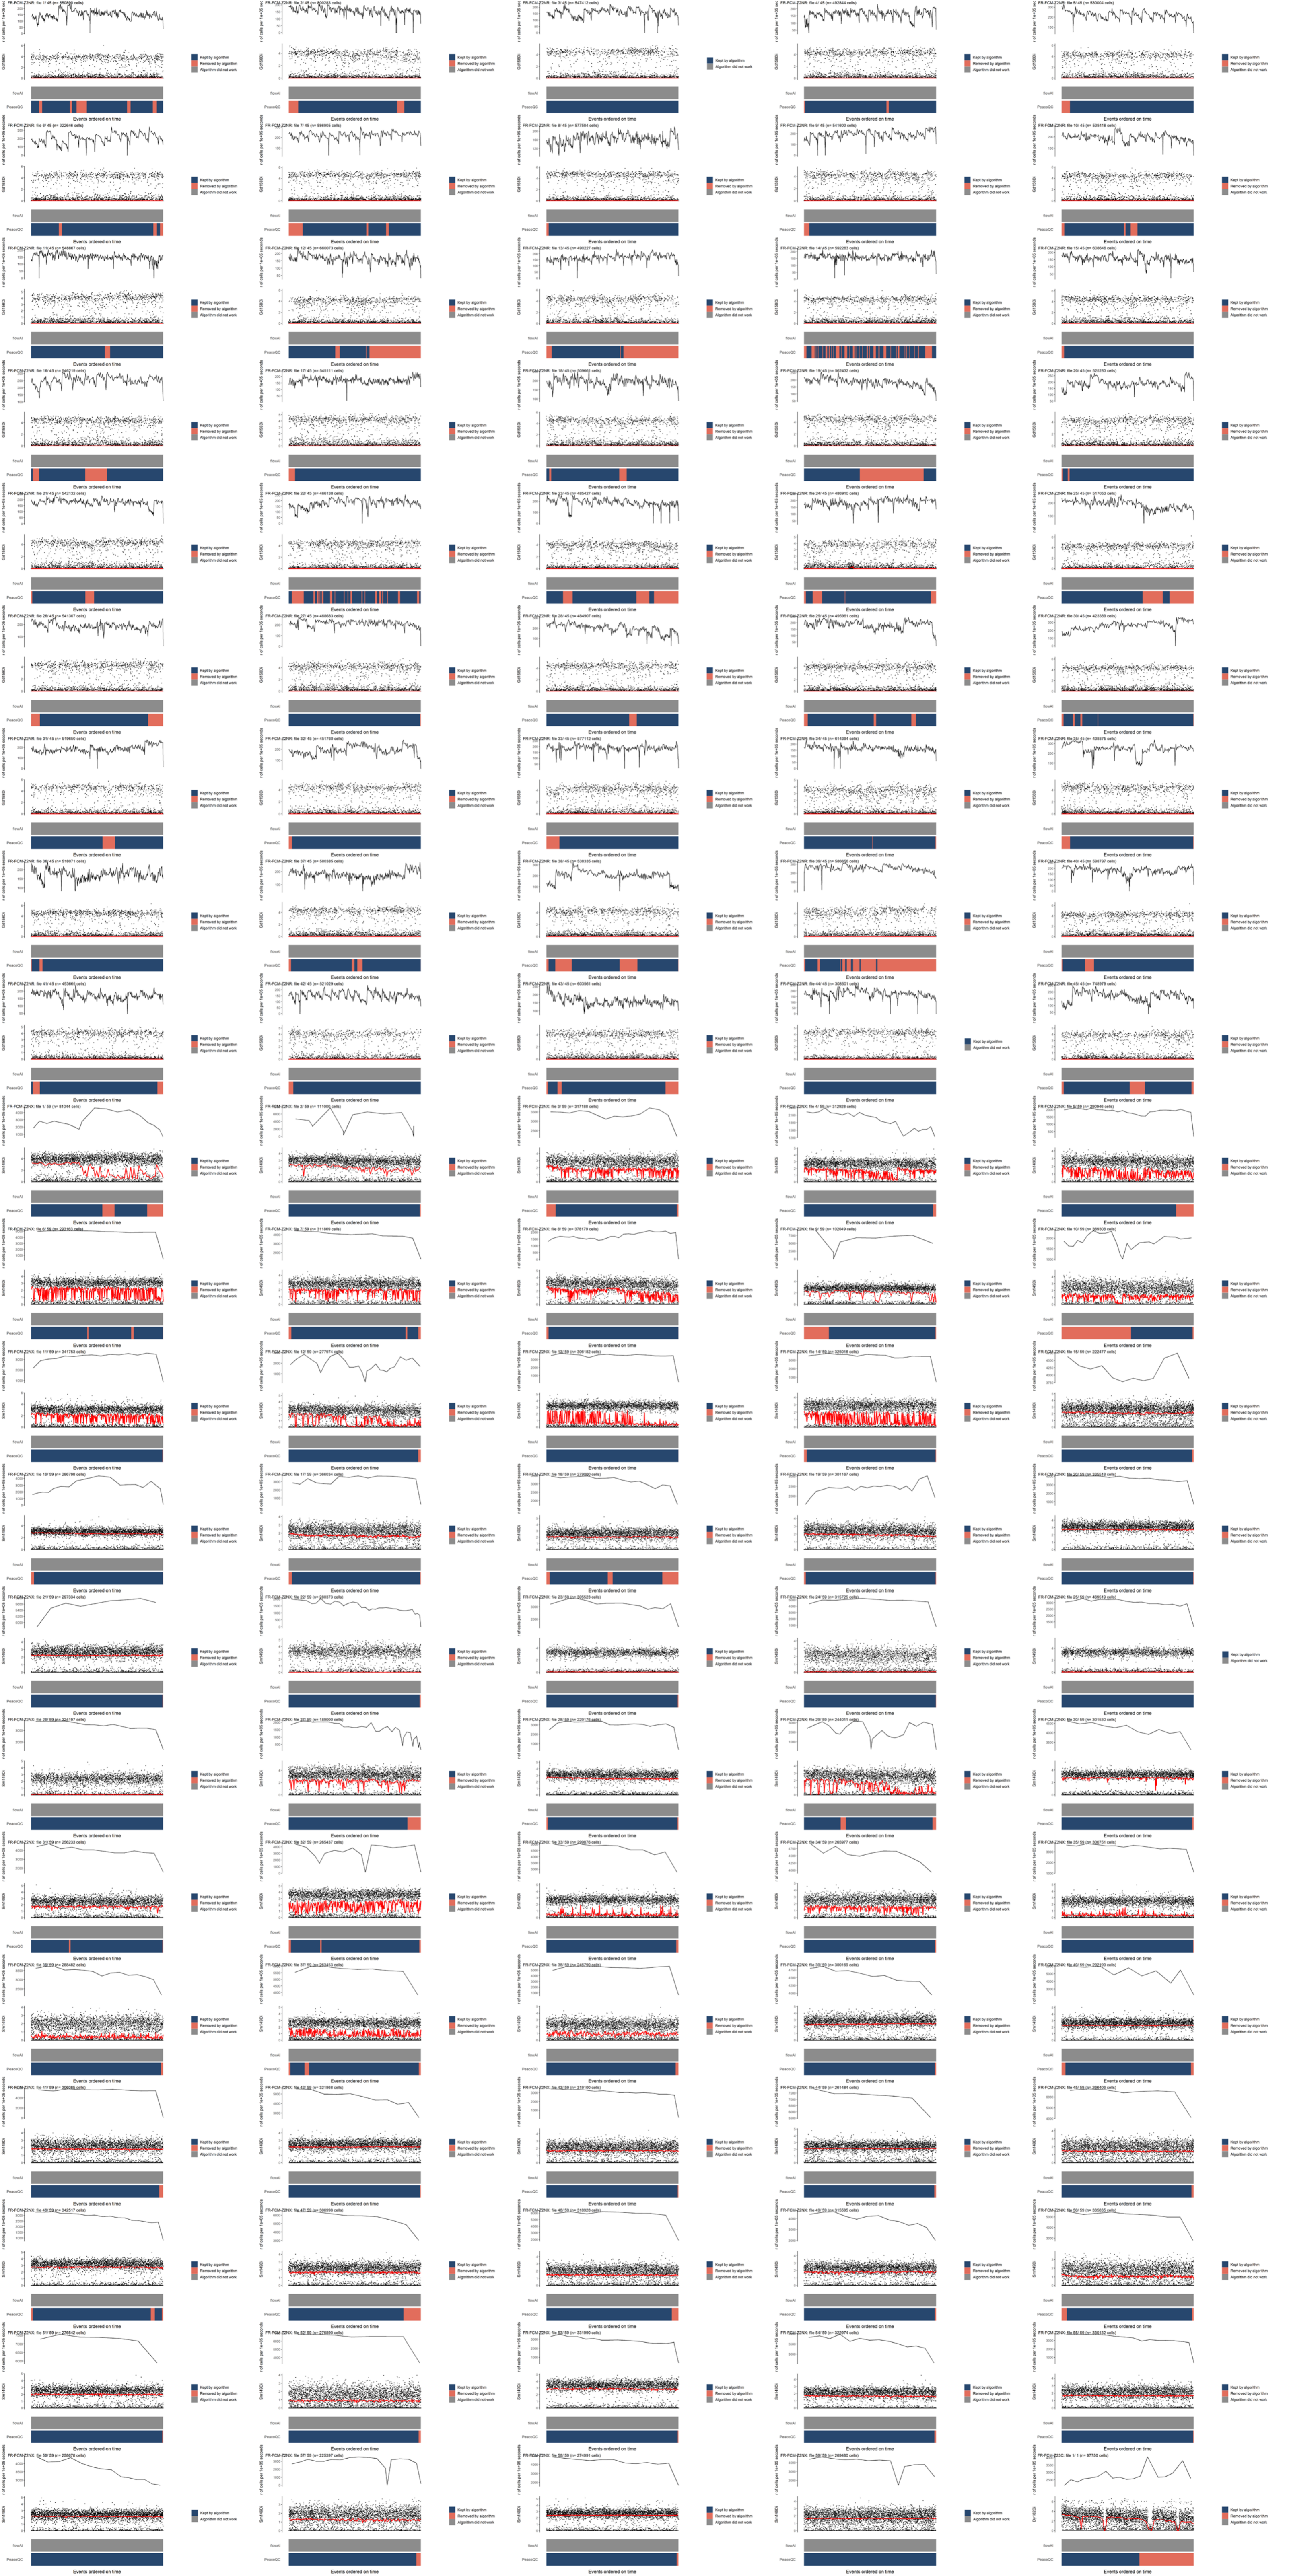

Supplement: CYTO-101-325-s002.pdf [file CYTO-101-325-s002.pdf]

### Default

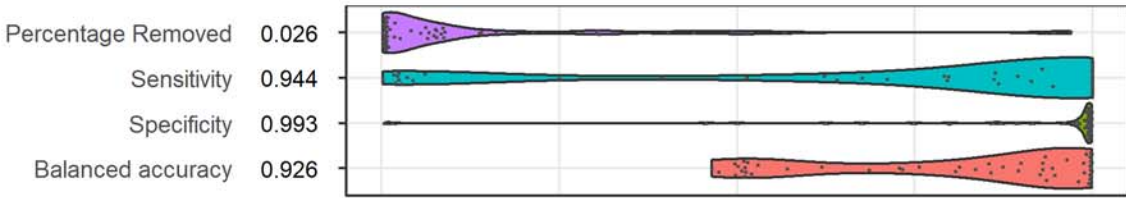

### FR

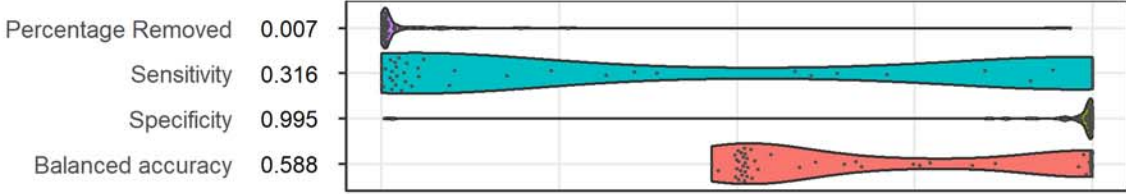

### FS

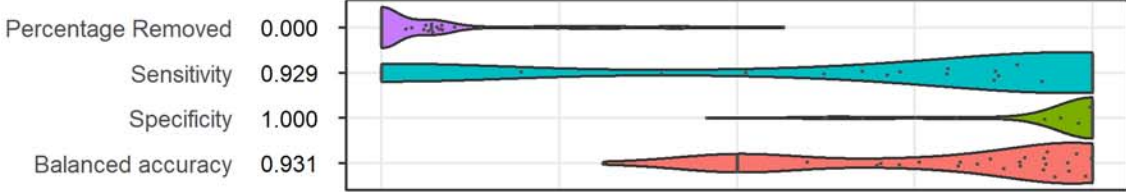

### FM

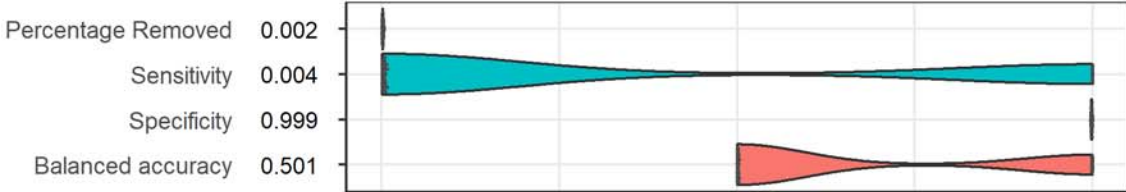

### FR & FS

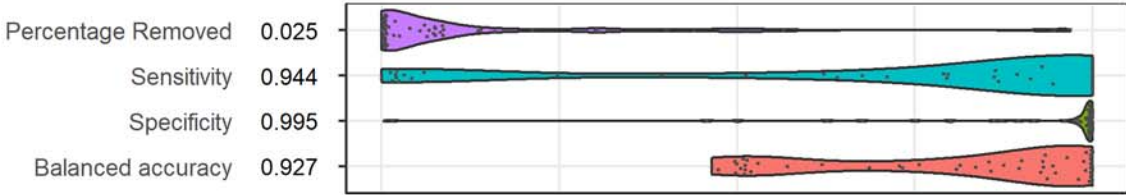

### FR & FM

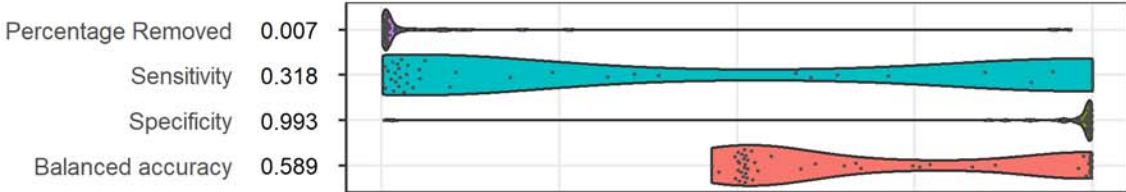

### FS & FM

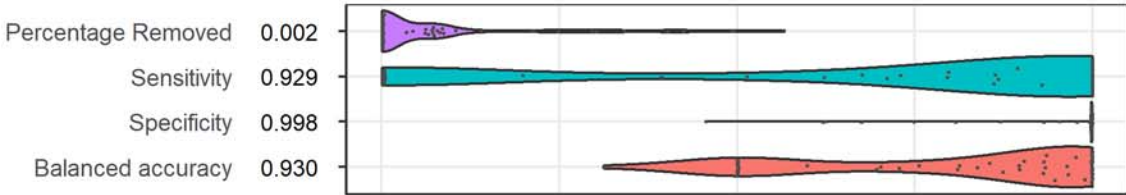

### FR first, FS second

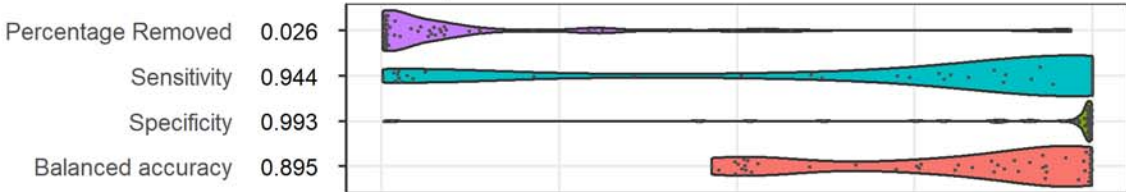

### Random (Percentage removed = golden standard)

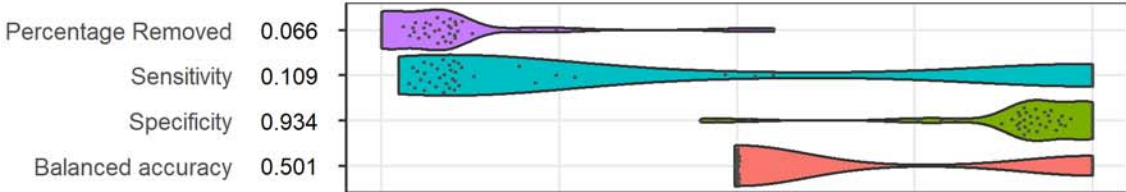

0.00 0.25 0.50 0.75 1.00

Supplement: CYTO-101-325-s004.pdf [file CYTO-101-325-s004.pdf]

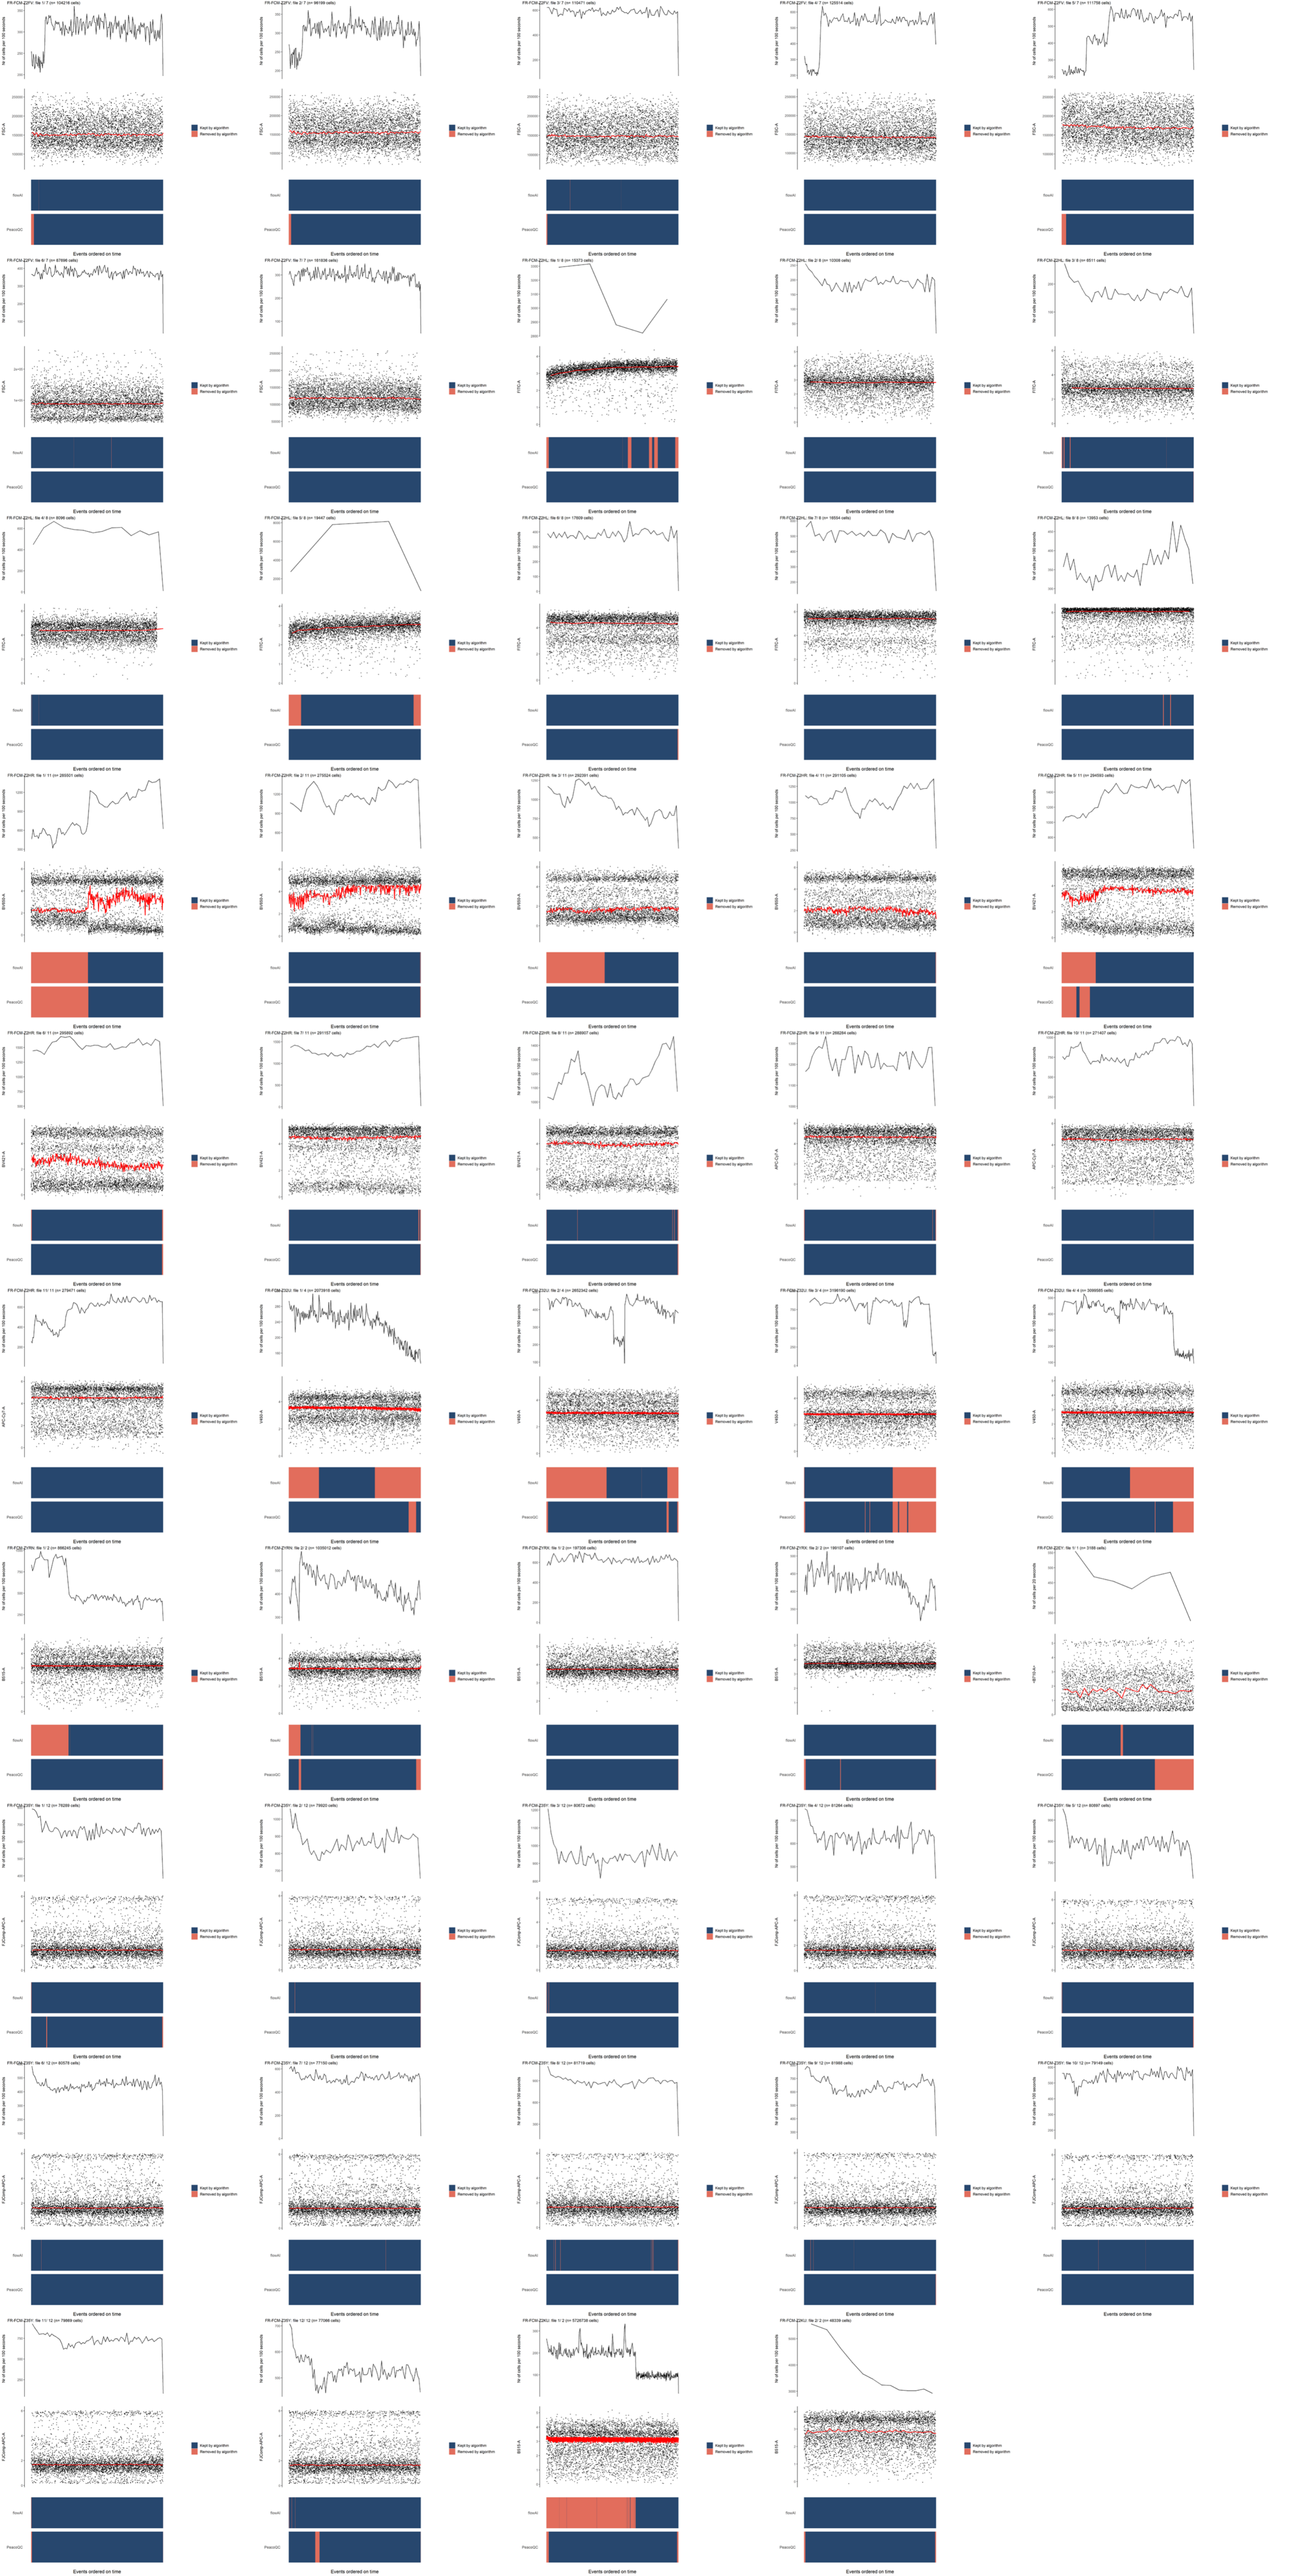

Supplement: CYTO-101-325-s005.pdf [file CYTO-101-325-s005.pdf]

### A: consecutive\_bins = 0

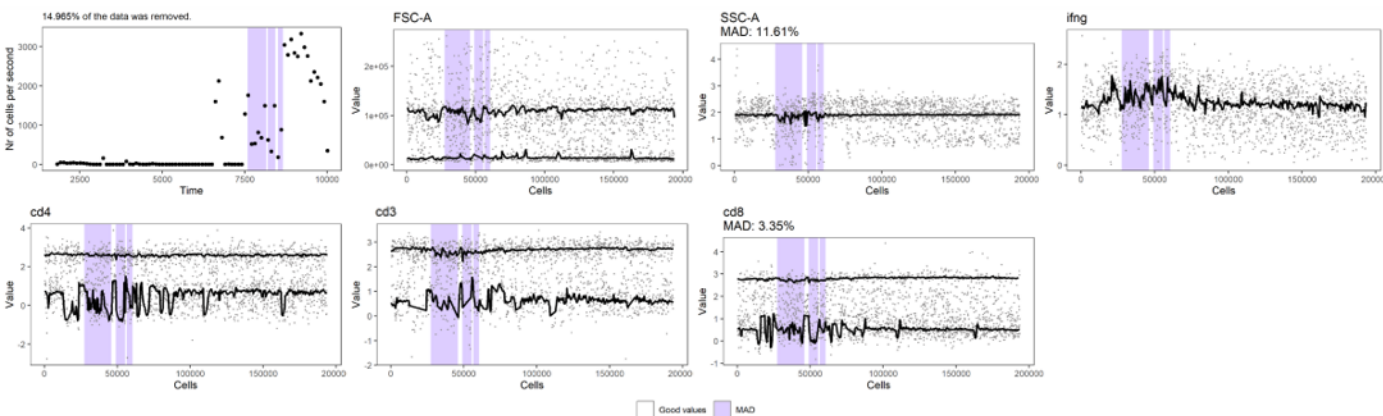

### B: consecutive\_bins = 5 (default)

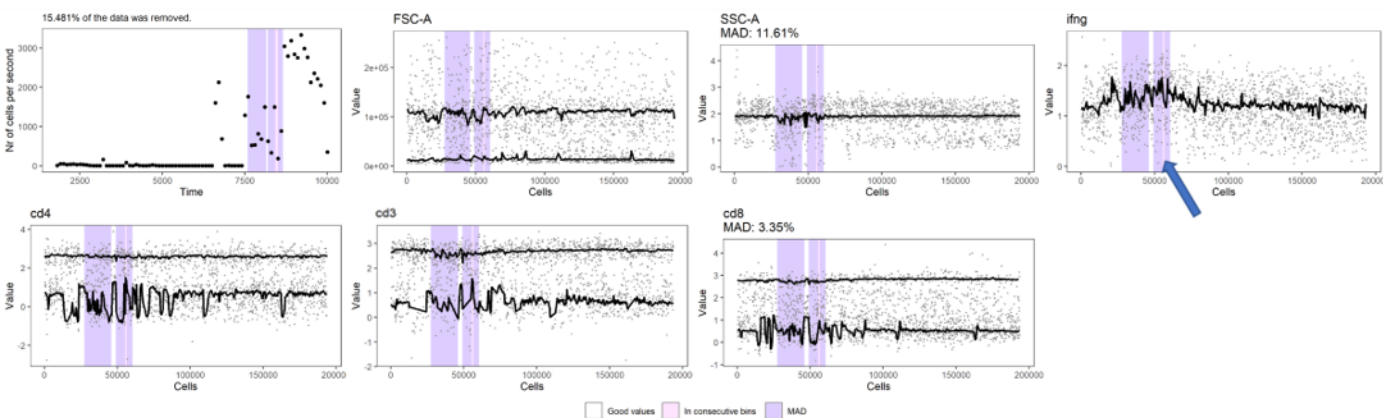

### C: consecutive\_bins = 10

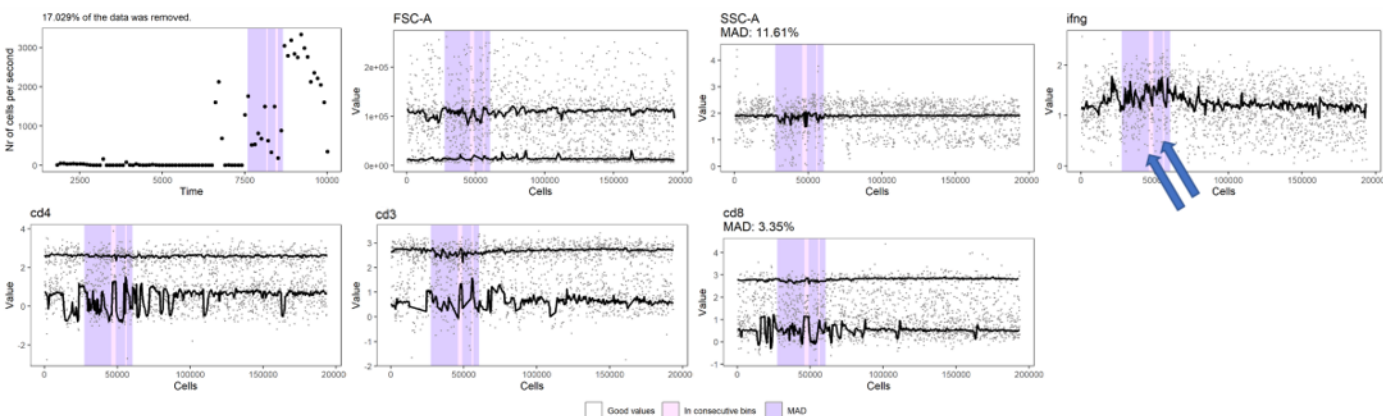

Supplement: CYTO-101-325-s007.pdf [file CYTO-101-325-s007.pdf]
